# Supplementary material
Source: Springer Nature journal article supplement (https://www.springermedizin.de/resource/supplementary/13002_2012_319_MOESM2_ESM.pdf/9627618)

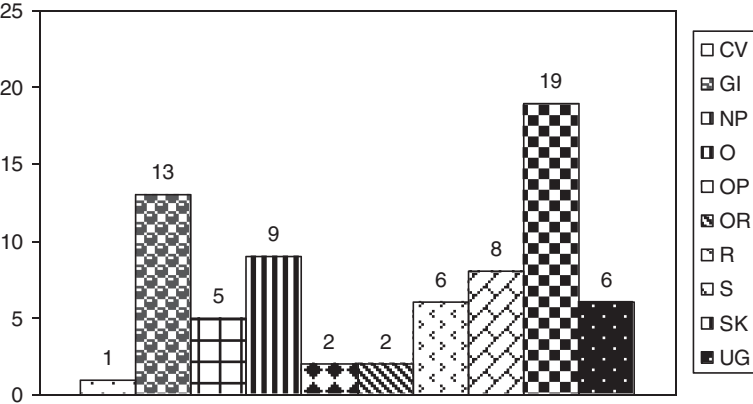

Supplement: MOESM2 [file 9627618]
